# Supplementary material for: Mechanistic study of oil adsorption onto PVP-coated magnetic nanoparticles: an integrated experimental and molecular dynamics study to inform remediation
Source: Royal Society of Chemistry journal article supplement (doi:10.1039/d0en00907e), 2020-12-10
Supplement: d0en00907e1.pdf [file d0en00907e1.pdf]

## Electronic Supplementary Information

### Mechanistic study of oil adsorption onto PVP-coated magnetic nanoparticles: An integrated experimental and molecular dynamics study to inform remediation

Linkel K. Boateng<sup>a</sup>, Seyyedali Mirshahghassemi<sup>b</sup>, Haibin Wu<sup>c</sup>, Joseph R.V. Flora<sup>a</sup>, Vicki H. Grassian<sup>c,\*</sup>, Jamie R. Lead<sup>b,\*</sup>

<sup>a</sup> Department of Civil and Environmental Engineering, University of South Carolina, Columbia, SC, 29208, United States

<sup>b</sup> Center for Environmental Nanoscience and Risk (CENR), Department of Environmental Health Sciences, Arnold School of Public Health, University of South Carolina, Columbia, South Carolina 29208, United States

<sup>c</sup> Department of Chemistry & Biochemistry, University of California San Diego, La Jolla, 92093, United States

**Video S1.** Video showing the simulation of crude oil adsorption onto PVP-coated NP in water.

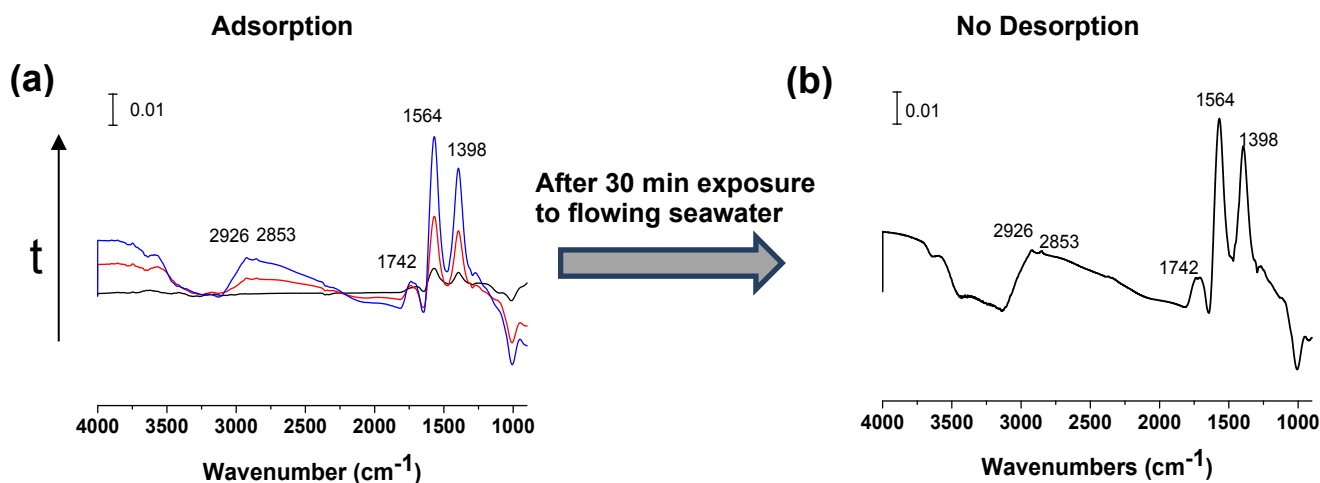

**Fig. S1** ATR-FTIR spectra of FA adsorption onto PVP-coated Fe<sub>3</sub>O<sub>4</sub> NPs (a) 10 ppm FA flow for adsorption, (b) sea water flow for desorption; black, red and blue lines represent 15, 90 and 120 min, respectively.
